# Supplementary material
Source: Springer Nature journal article supplement (https://www.springermedizin.de/resource/supplementary/12889_2012_4088_MOESM2_ESM.pdf/9491568)

**Moderate-intensity physical activity**

30 minutes  
≥ 5 times weekly

Pedometer  
Web page to monitor activities

**Circuit training**

45 minutes  
Twice weekly

Warm up  
Muscle strength  
3 x 10 repetitions  
50-80 % of 1 RM  
hydraulic machines

Aerobic exercise  
3 x 10 stations  
60-85% of heart rate maximum

Cool down & stretching

Physio coach available 1 hour every other week

**Support group meetings**

60 minutes  
Every other week

Content and behavioral strategies based on SCT and TTM

5-10 participants/group

Trained physio coaches

Meetings based on handbook

**Expert lectures**

1-2 first year on:

Medication  
Complementary medicine  
Diet  
Hand training  
Feet and shoes

Try alternative physical activities in new settings  
Challenge competitions, The Fox-walk test,  
Short text messages

**HEPA**  
Knowledge, attitudes, skills  
Behaviour

**Outcome**  
Perceived health  
Aerobic capacity  
Muscle function

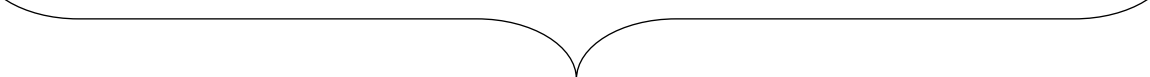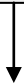

Supplement: MOESM2 [file 9491568]
